# Supplementary material for: High-quality chromosome-level de novo assembly of the Trifolium repens
Source: PubMed Central journal article supplement (PMC10265827; doi:10.1186/s12864-023-09437-8), 2023-06-13

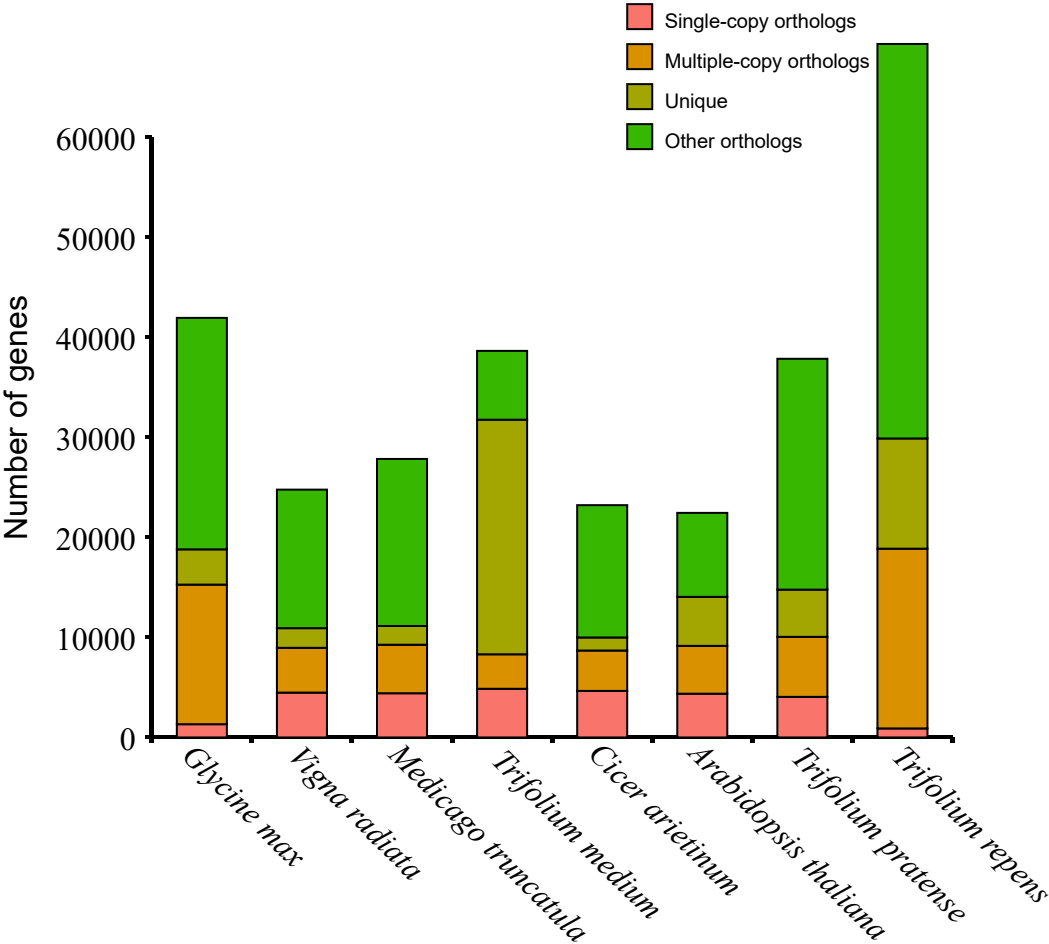

Supplement: 12864_2023_9437_MOESM2_ESM.pdf [file 12864_2023_9437_MOESM2_ESM.pdf]
