# Supplementary material for: High-quality chromosome-level de novo assembly of the Trifolium repens
Source: PubMed Central journal article supplement (PMC10265827; doi:10.1186/s12864-023-09437-8), 2023-06-13
Supplement: 12864_2023_9437_MOESM3_ESM.pdf [file 12864_2023_9437_MOESM3_ESM.pdf]

**Table S1. Benchmarking Universal Single-Copy Orthologs analysis of white clover**

---

| BUSCO notation assessment results |        |
|-----------------------------------|--------|
| Complete single-copy BUSCOs       | 98.5%  |
| Complete and single-copy BUSCOs   | 16.00% |
| Complete Duplicated BUSCOs        | 82.50% |
| Fragmented BUSCOs                 | 0.10%  |
| Missing BUSCOs                    | 1.40%  |
| Total BUSCO groups searched       | 2326   |

---
