# Supplementary material for: High-quality chromosome-level de novo assembly of the Trifolium repens
Source: PubMed Central journal article supplement (PMC10265827; doi:10.1186/s12864-023-09437-8), 2023-06-13
Supplement: 12864_2023_9437_MOESM4_ESM.pdf [file 12864_2023_9437_MOESM4_ESM.pdf]

**Table S2. Chromosome sequence distribution statistics**

| <b>ID</b> | <b>Chromosome</b> | <b>Sequence Number</b> | <b>Sequence Length (bp)</b>   |
|-----------|-------------------|------------------------|-------------------------------|
| 1         | Chr01             | 11                     | 81,754,482                    |
| 2         | Chr02             | 26                     | 72,856,632                    |
| 3         | Chr03             | 7                      | 70,812,884                    |
| 4         | Chr04             | 15                     | 69,481,492                    |
| 5         | Chr05             | 9                      | 66,386,749                    |
| 6         | Chr06             | 10                     | 65,913,581                    |
| 7         | Chr07             | 5                      | 64,655,134                    |
| 8         | Chr08             | 13                     | 64,541,361                    |
| 9         | Chr09             | 7                      | 64,016,903                    |
| 10        | Chr10             | 16                     | 62,980,941                    |
| 11        | Chr11             | 16                     | 62,644,447                    |
| 12        | Chr12             | 11                     | 62,405,417                    |
| 13        | Chr13             | 2                      | 61,529,956                    |
| 14        | Chr14             | 9                      | 59,709,593                    |
| 15        | Chr15             | 3                      | 56,043,553                    |
| 16        | Chr16             | 6                      | 55,734,426                    |
|           | <b>Total</b>      | <b>168 (40.6%)</b>     | <b>1,041,467,551 (95.06%)</b> |
