# Supplementary material for: High-quality chromosome-level de novo assembly of the Trifolium repens
Source: PubMed Central journal article supplement (PMC10265827; doi:10.1186/s12864-023-09437-8), 2023-06-13
Supplement: 12864_2023_9437_MOESM5_ESM.pdf [file 12864_2023_9437_MOESM5_ESM.pdf]

**Table S3. repeat sequences results**

|                          | <b>Repeat type</b>      | <b>Classification</b> | <b>Number</b> |
|--------------------------|-------------------------|-----------------------|---------------|
|                          |                         | Copia                 | 282,245       |
| Class I: Retrotransposon | LTR-Retrotransposon     | Gypsy                 | 160,786       |
|                          |                         | Others                | 443,194       |
|                          | Non-LTR Retrotransposon | LINE                  | 71,845        |
|                          |                         | CMC-EnSpm             | 4,284         |
|                          |                         | MULE-MuDR             | 12,493        |
|                          | Subclass I              | PIF-Harbinger         | 2,823         |
|                          |                         | hAT-Ac                | 1,385         |
| Class II: DNATransposon  |                         | hAT-Tag1              | 1,768         |
|                          |                         | Others                | 560,300       |
|                          | Subclass II             | Helitron              | 6,987         |
|                          | Tandem Repeat           | Simple repeat         | 4,092         |
|                          | Other                   | -                     | 148           |
|                          | Unknown                 | -                     | 471,061       |
|                          | Total                   | -                     | 2,023,411     |

---

| <b>Masked(bp)</b> | <b>Masked(%)</b> |
|-------------------|------------------|
| 14,589,712        | 13.56%           |
| 125,896,098       | 11.49%           |
| 139,112,843       | 12.70%           |
| 27,400,733        | 2.50%            |
| 1,678,603         | 0.15%            |
| 5,633,452         | 0.51%            |
| 974,162           | 0.09%            |
| 690,599           | 0.06%            |
| 520,015           | 0.05%            |
| 134,900,423       | 12.31%           |
| 2,731,100         | 0.25%            |
| 508,915           | 0.05%            |
| 19,826            | 0.00%            |
| 83,741,318        | 7.64%            |
| 672,397,799       | 61.37%           |

---
