# Supplementary material for: High-quality chromosome-level de novo assembly of the Trifolium repens
Source: PubMed Central journal article supplement (PMC10265827; doi:10.1186/s12864-023-09437-8), 2023-06-13
Supplement: 12864_2023_9437_MOESM8_ESM.pdf [file 12864_2023_9437_MOESM8_ESM.pdf]

Table S6. URLs and code of the software.

| Number | Software         | Version         | Code                                                                                                       | Website                                                                                                                                  |
|--------|------------------|-----------------|------------------------------------------------------------------------------------------------------------|------------------------------------------------------------------------------------------------------------------------------------------|
| 1      | Jellyfish        | v1.1.11         | -m 19 -t 60 -C -c 8                                                                                        | <a href="http://www.cbcb.umd.edu/software/jellyfish/">http://www.cbcb.umd.edu/software/jellyfish/</a>                                    |
| 2      | Minia            | v3.2.4          | Default code                                                                                               | <a href="https://github.com/GATB/minia/releases">https://github.com/GATB/minia/releases</a>                                              |
| 3      | Smrtlink         | v8.0            | Default code                                                                                               | <a href="https://www.pacb.com/">https://www.pacb.com/</a>                                                                                |
| 4      | Hifiasm          | v0.15.2         | -l 0                                                                                                       | <a href="https://github.com/chhylp123/hifiasm">https://github.com/chhylp123/hifiasm</a>                                                  |
| 5      | Purge_dups       | v1.2.3          | -2 -T changed.cutoffs -l XXX -mXXX -<br>u XXX                                                              | <a href="https://github.com/dfguan/purge_dups">https://github.com/dfguan/purge_dups</a>                                                  |
| 6      | Minimap2         | v 2.13          | -I6G -ax map-pb -t 60                                                                                      | <a href="https://github.com/lh3/minimap2">https://github.com/lh3/minimap2</a>                                                            |
| 7      | BWA              | v0.7.15         | mem -t 96 -M -S                                                                                            | <a href="http://bio-bwa.sourceforge.net/">http://bio-bwa.sourceforge.net/</a>                                                            |
| 8      | BUSCO            | V4.0.6          | -c 60 -m geno --offline                                                                                    | <a href="https://busco.ezlab.org/">https://busco.ezlab.org/</a>                                                                          |
| 9      | Blast            | v2.12.0         | -evalue 1e-5                                                                                               | <a href="https://blast.ncbi.nlm.nih.gov/Blast.cgi">https://blast.ncbi.nlm.nih.gov/Blast.cgi</a>                                          |
| 10     | JUICER           | v1.6.2          | Default code                                                                                               | <a href="https://github.com/aidenlab/juicer">https://github.com/aidenlab/juicer</a>                                                      |
| 11     | 3D-DNA           | 180922          | Default code                                                                                               | <a href="https://github.com/theaidenlab/3d-dna">https://github.com/theaidenlab/3d-dna</a>                                                |
| 12     | Augustus         | v3.2.2          | --species --alternatives-from-<br>evidence --alternatives-from-sampling<br>--allow hinted splicesites=atac | <a href="http://augustus.gobics.de/binaries/">http://augustus.gobics.de/binaries/</a>                                                    |
| 13     | EVM              | r2012-06-<br>25 | --gene_predictions --<br>protein_alignments --                                                             | <a href="https://sourceforge.net/projects/evidencemodeler/">https://sourceforge.net/projects/evidencemodeler/</a>                        |
| 14     | GeneMark-ESSuite | v4.57           | --ET --cores 48 --max_gap 3000                                                                             | <a href="http://topaz.gatech.edu/GeneMark/license_download.cgi">http://topaz.gatech.edu/GeneMark/license_download<br/>.cgi</a>           |
| 15     | GeMoMa           | v1.7.1          | Default code                                                                                               | <a href="http://www.jstacs.de/index.php/GeMoMa">http://www.jstacs.de/index.php/GeMoMa</a>                                                |
| 16     | Glimmerhmm       | v3.0.4          | Default code                                                                                               | <a href="http://ccb.jhu.edu/software/glimmerhmm/">http://ccb.jhu.edu/software/glimmerhmm/</a>                                            |
| 17     | LTR Finder       | v1.07           | -D 15000 -d 1000 -L 7000 -l 100 -p 20<br>-C -M 0.9                                                         | <a href="https://github.com/xzhub/LTR_Finder">https://github.com/xzhub/LTR_Finder</a>                                                    |
| 18     | LTR retriever    | v2.8.2          | Default code                                                                                               | <a href="https://github.com/oushujun/LTR_retriever">https://github.com/oushujun/LTR_retriever</a>                                        |
| 19     | PASA             | v<br>r20140417  | -c alignAssembly.config -C -R --<br>ALIGNERS blat,gmap --CPU 32 --<br>stringent alignment overlap 30.0     | <a href="https://sourceforge.net/projects/pasa/files/stats/timeline">https://sourceforge.net/projects/pasa/files/stats<br/>/timeline</a> |
| 20     | MITE Hunter      | v1.0            | -n 5 -c 20 -S 12345678                                                                                     | <a href="http://target.iplantcollaborative.org/mite_hunter">http://target.iplantcollaborative.org/mite_hunter</a>                        |
| 21     | RepeatMasker     | v4.1.0          | -nolow -norna -gff -engine ncbi<br>-parallel 20 -no is                                                     | <a href="http://www.repeatmasker.org/RMDownload.html">http://www.repeatmasker.org/RMDownload.html</a>                                    |
| 22     | RepeatModeler    | v2.0            | -engine ncbi -pa 60 -database                                                                              | <a href="http://www.repeatmasker.org/RepeatModeler/">http://www.repeatmasker.org/RepeatModeler/</a>                                      |
| 23     | SNAP             | v6.0            | Default code                                                                                               | <a href="http://snap.stanford.edu/snap/download.html">http://snap.stanford.edu/snap/download.html</a>                                    |

|    |             |        |                             |                                                                                                                                       |
|----|-------------|--------|-----------------------------|---------------------------------------------------------------------------------------------------------------------------------------|
| 24 | tRNAscan-SE | v2.0   | Default code                | <a href="http://lowelab.ucsc.edu/tRNAscan-SE/">http://lowelab.ucsc.edu/tRNAscan-SE/</a>                                               |
| 25 | Café        | v3.1   | -p 0.05 -t 4                | <a href="https://github.com/hahnlab/CAFÉ">https://github.com/hahnlab/CAFÉ</a>                                                         |
| 26 | Lastz       | v1.04  | Default code                | <a href="http://www.bx.psu.edu/miller_lab/dist/README.lastz-1.02.00/">http://www.bx.psu.edu/miller_lab/dist/README.lastz-1.02.00/</a> |
| 27 | Mafft       | v7.310 | --auto --anysymbol --thread | <a href="https://mafft.cbrc.jp/alignment/software/">https://mafft.cbrc.jp/alignment/software/</a>                                     |
| 28 | Mcscan      | vX     | -s {num}                    | <a href="http://chibba.agtec.uga.edu/duplication/mcscan/">http://chibba.agtec.uga.edu/duplication/mcscan/</a>                         |
| 29 | Mummer      | v4.1   | -g 1000 -r -q -l 200 -rclot | <a href="https://github.com/mummer4/mummer">https://github.com/mummer4/mummer</a>                                                     |
| 30 | OrthoMCL    | v2.0.9 | --abc -I 1.5                | <a href="https://orthomcl.org/orthomcl/">https://orthomcl.org/orthomcl/</a>                                                           |
| 31 | PAML        | v4.9e  | Default code                | <a href="http://abacus.gene.ucl.ac.uk/software/paml.html">http://abacus.gene.ucl.ac.uk/software/paml.html</a>                         |
